# Supplementary material for: Laser-assisted fabrication of a 3D cross-linked V2CTx/rGO microelectrode for high-rate aqueous zinc-ion microbatteries
Source: Royal Society of Chemistry journal article supplement (doi:10.1039/d4ta01359j), 2024-01-01
Supplement: d4ta01359j1.pdf [file d4ta01359j1.pdf]

## **Supporting Information**

### **Laser-Assisted Fabrication of a 3D Cross-linked V<sub>2</sub>CT<sub>x</sub>/rGO Microelectrodes for High-Rate Aqueous Zinc-Ion Microbatteries**

Jiao Wu,<sup>a</sup> Long Liu,<sup>a</sup> Cai-Yun Ren,<sup>b</sup> Yong-Chao Zhang,<sup>a</sup> Jian Gao,<sup>\*a</sup> and Xiao-Dong Zhu<sup>\*a</sup>

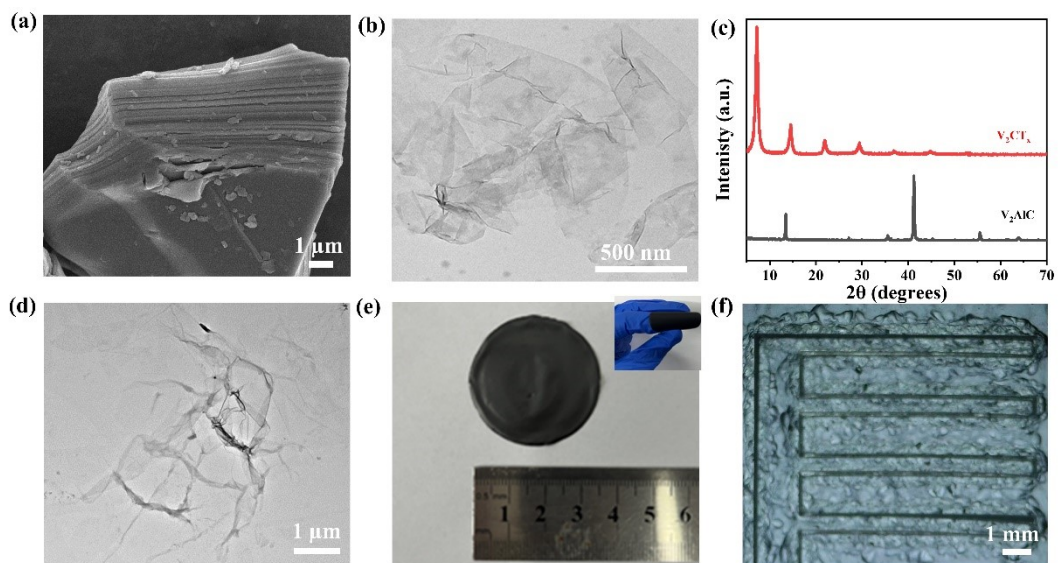

**Figure S1.** (a) SEM image of the MAX Phase of  $V_2AlC$ . (b) TEM image of the  $V_2CT_x$  flakes. (c) XRD patterns of the MAX phase of  $V_2AlC$  and the  $V_2CT_x$  flakes. (d) TEM image of the GO flakes. (e) Digital photographs of the  $V_2CT_x@GO$  hybrid film and its flexible display. (f) Digital photograph of the interfinger patterned electrode.

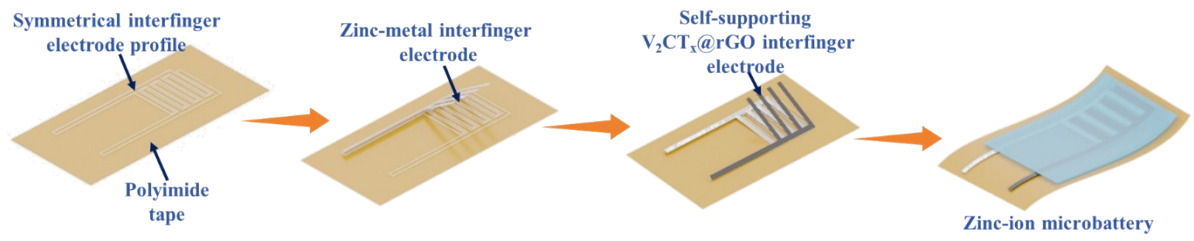

**Figure S2.** The schematic procedure of electrode transfer process.

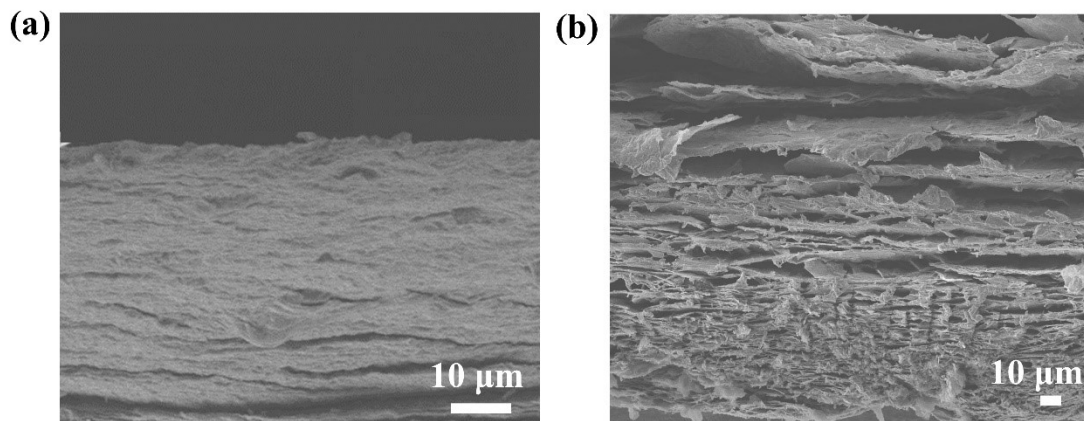

**Figure S3.** (a) SEM image of the 2D  $V_2CT_x@GO$ -60% hybrid film cross section. (b) SEM image of 3D  $V_2CT_x@rGO$ -60% hybrid foam cross section.

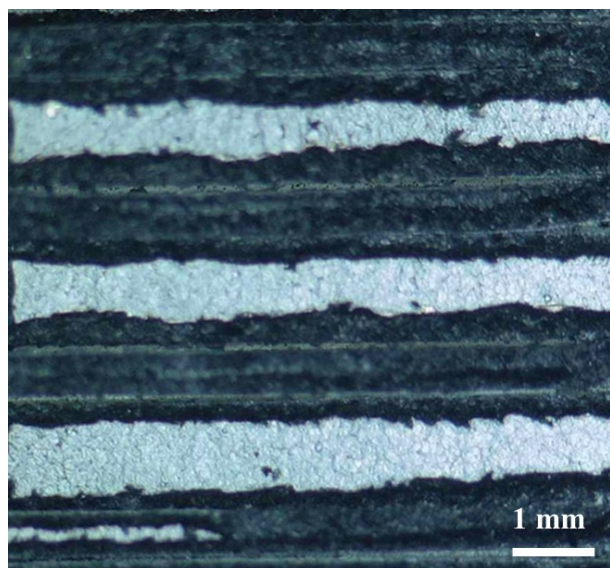

**Figure S4.** The magnification pattern of V<sub>2</sub>CT<sub>x</sub>@rGO-70% interfinger microelectrode

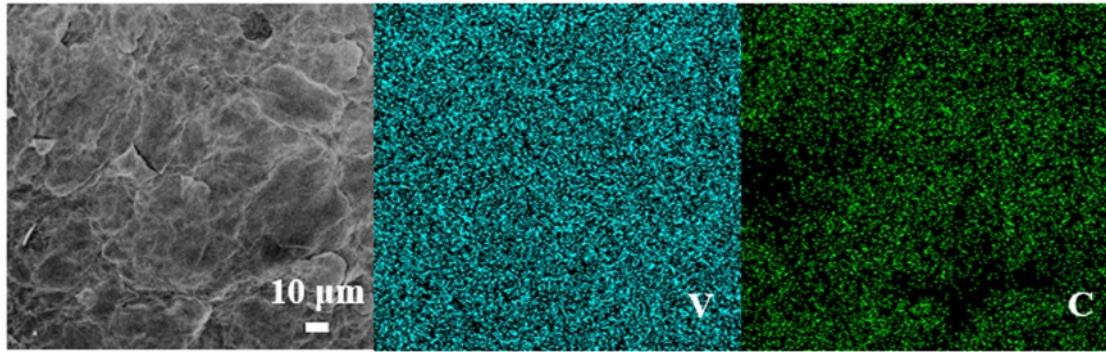

**Figure S5.** The planar SEM image of the 3D hybrid foam and corresponding EDS elemental mapping

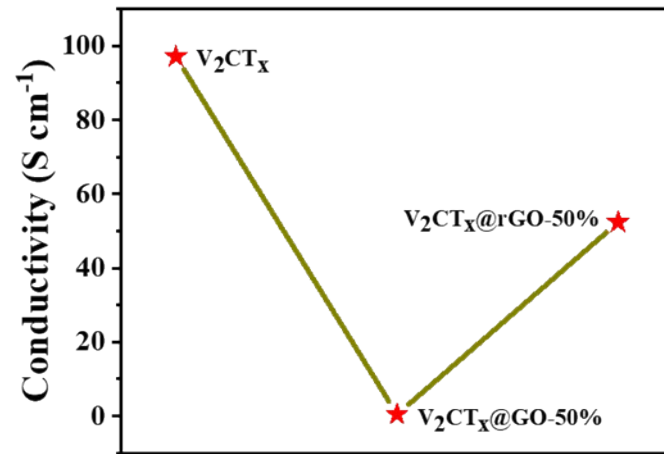

**Figure S6.** The electronic conductivity of the V<sub>2</sub>CT<sub>x</sub>@GO-50%, V<sub>2</sub>CT<sub>x</sub>@rGO-50% and V<sub>2</sub>CT<sub>x</sub>

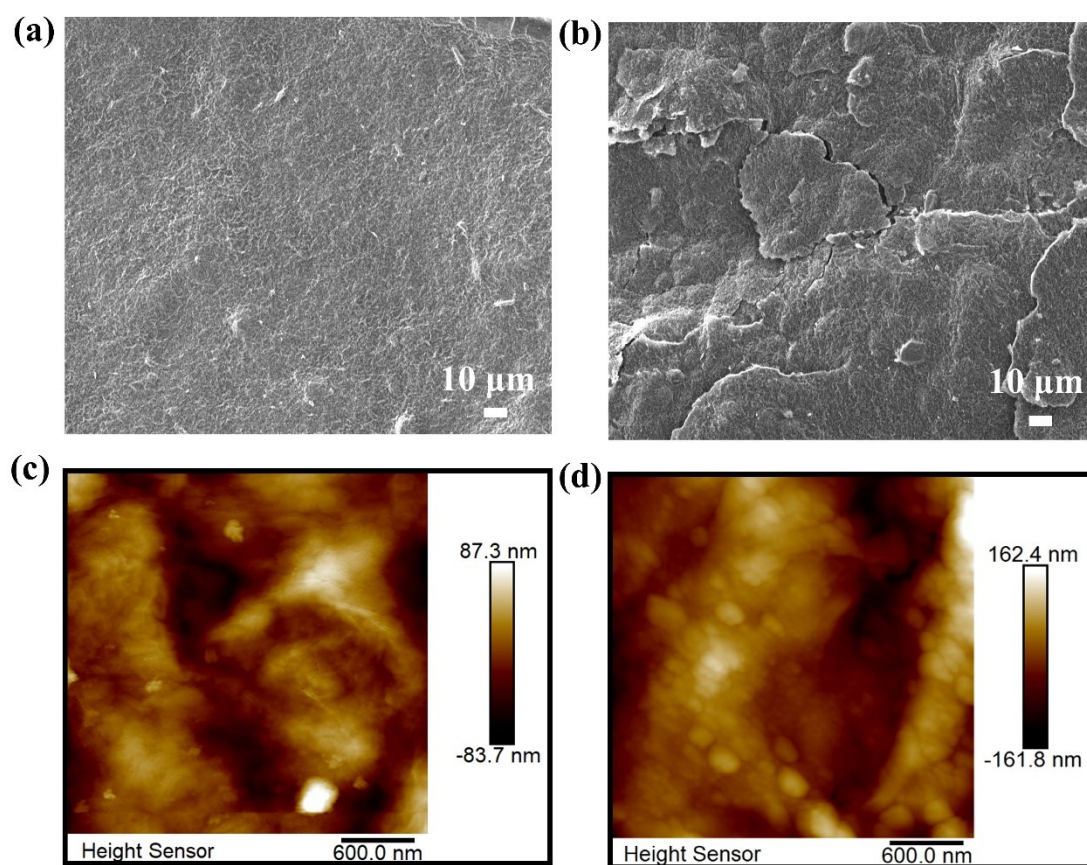

**Figure S7.** (a-b) Planar SEM images of V<sub>2</sub>CT<sub>x</sub>@GO-50% film and V<sub>2</sub>CT<sub>x</sub>@rGO-50% foam. (c-d) Planar AFM images of V<sub>2</sub>CT<sub>x</sub>@GO-50% film and V<sub>2</sub>CT<sub>x</sub>@rGO-50% foam.



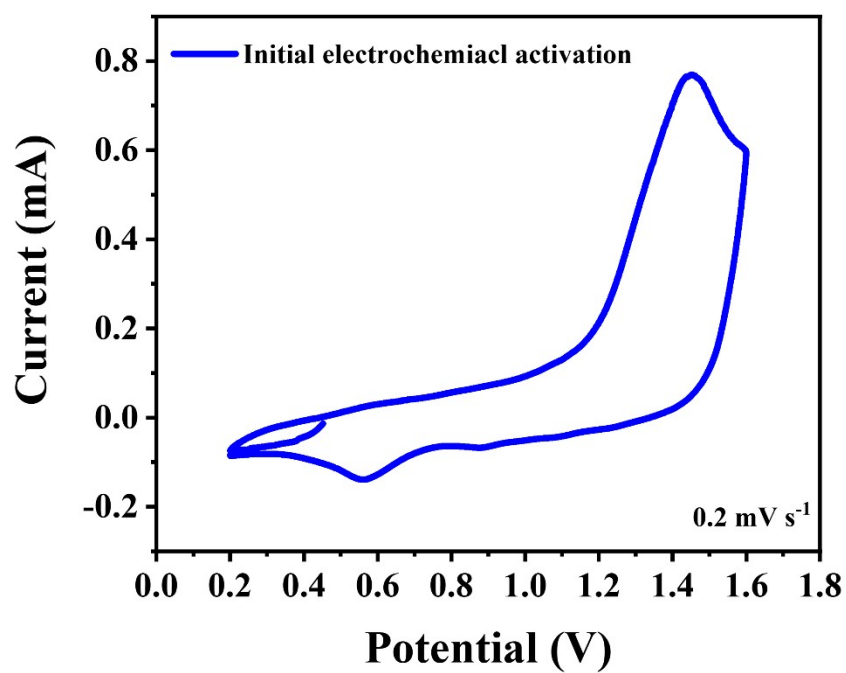

**Figure S8.** CV profile of the initial electrochemical oxidation about 3D VO<sub>x</sub>-V<sub>2</sub>CT<sub>x</sub>@rGO.

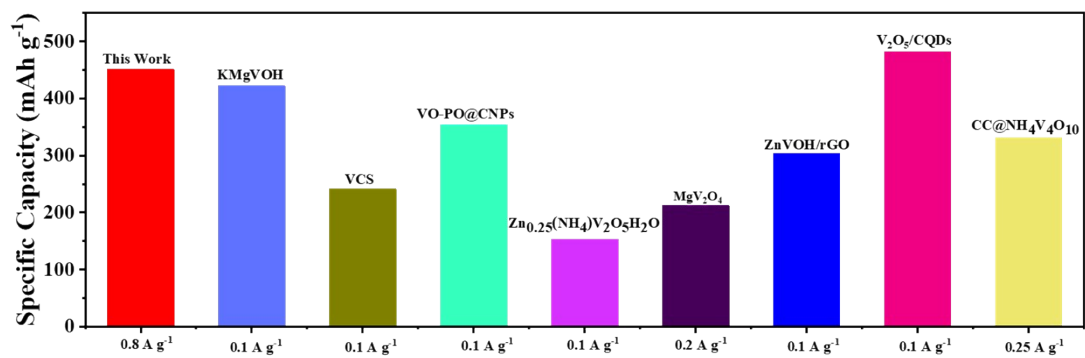

**Figure S9.** The performance comparison bar charts for specific capacity

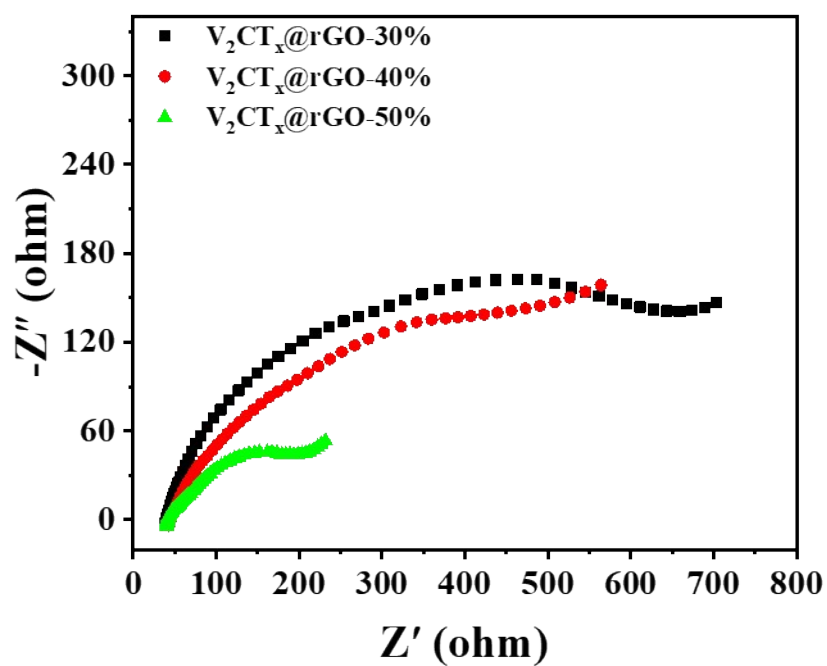

**Figure S10.** The electrochemical impedance spectroscopy (EIS) measured with 3D  $V_2CT_x@rGO-50\%/40\%/30\%$  microelectrodes

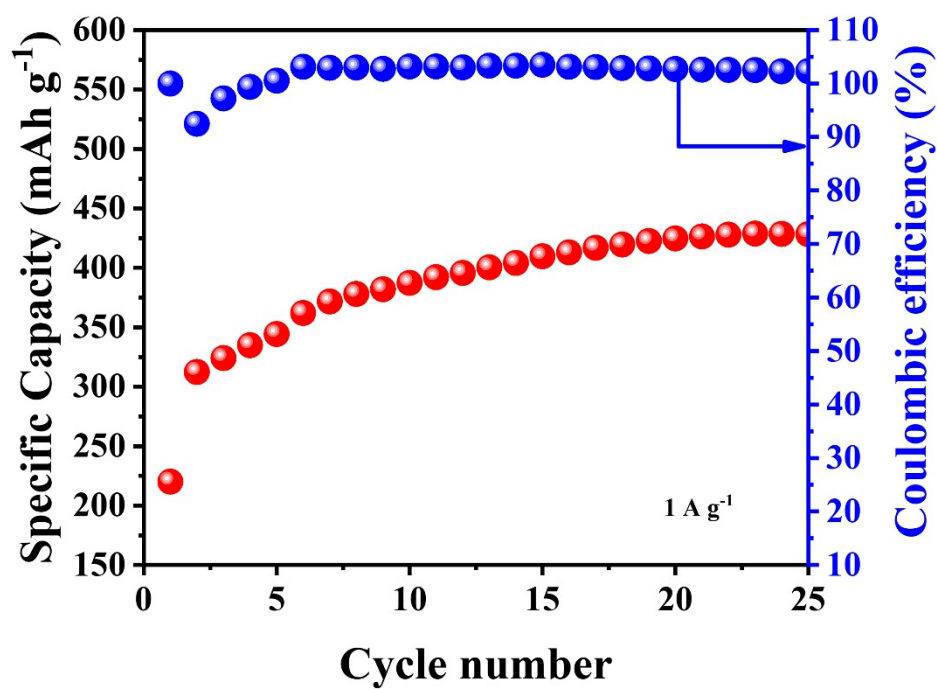

**Figure S11.** Shorter cycle performance and the corresponding Coulombic efficiency at 1 A g<sup>-1</sup> for up to 25 cycles.

**Table S1.** The performance comparison with other microbatteries

| Cathode materials                     | Power density<br>( $\mu\text{W cm}^{-2}$ ) | Energy density<br>( $\mu\text{Wh cm}^{-2}$ ) | Ref  |
|---------------------------------------|--------------------------------------------|----------------------------------------------|------|
| $\text{V}_2\text{O}_5@\text{CNTs}$    | 193                                        | 112.5                                        | [39] |
| PANI                                  | 99                                         | 31                                           | [42] |
| PANI                                  | 990                                        | 250                                          | [44] |
| $\text{MnO}_x/\text{polypyrrole}$     | 178.8                                      | 50                                           | [41] |
| $\text{VO}_2(\text{B})\text{-MWCNTs}$ | 88.61                                      | 124.2                                        | [8]  |
| $\text{MnO}_2@\text{VG}$              | 67.16                                      | 201.5                                        | [40] |
| $\text{MnO}_2/\text{CNT}$             | -                                          | 154.6                                        | [43] |
| KMO/rGO                               | -                                          | 244                                          | [45] |
| (This work)                           | 615.8                                      | 353.54                                       |      |
